# Supplementary material
Source: PubMed Central journal article supplement (PMC4356786)

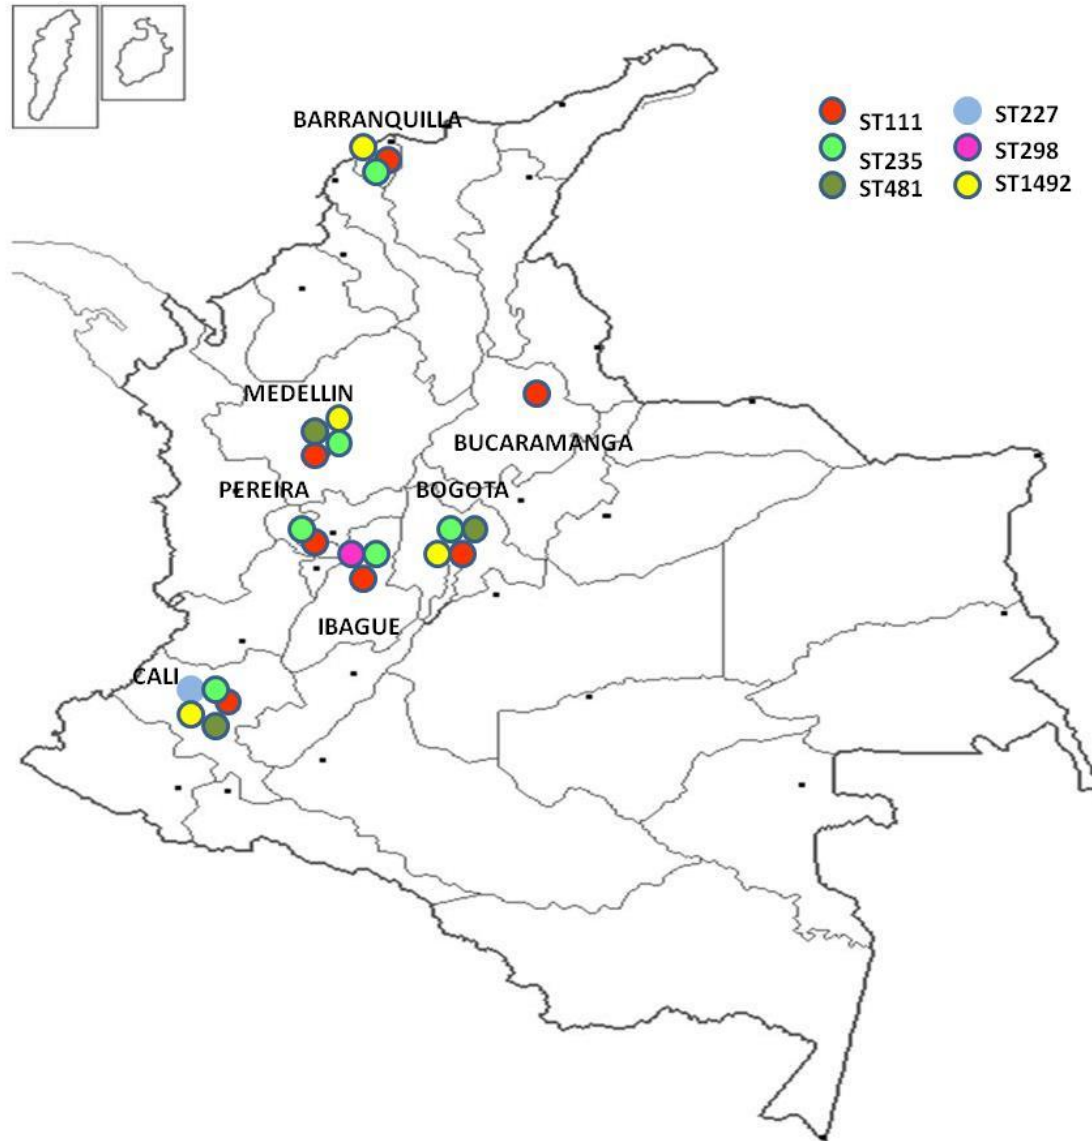

**Figure S1: Sequence types (STs) of *Pseudomonas aeruginosa* found in seven Colombian cities.**

Supplement: AAC.03926-14_zac004153830so1.pdf [file AAC.03926-14_zac004153830so1.pdf]
